# Supplementary material
Source: publisher site journal article supplement (https://www.dovepress.com/get_supplementary_file.php?f=503449.xlsx)
Supplement: Supplementary file 1 [file get_supplementary_file.php]

## Sheet: Supplementary Table S1
Supplementary Table S1. Characteristics of the studied datasets.
GEO series	Control samples	DM samples	NHL samples	Total samples	Organism	Experiment type
GSE25724	7	6	0	13	Homo sapiens	Array
GSE25638	13	0	84	97	Homo sapiens	Array

## Sheet: Supplementary Table S2
Supplementary Table S2. Primers used for qRT-PCR.
Gene	Strand	5’ - 3’
GZMM	Forward	GCATGTGTAACAACAGCCGC
	Reverse	CGGGAGGCTTGAAGATGTCA
HSPG2	Forward	CCCGACTTCATCTCCTTCGG
	Reverse	GGTCACCCACAATCAGGGAG
SERPING1	Forward	TGCAGCTCTCCCACAATCTG
	Reverse	GCTGAGAGCCTGTTCCATGT

## Sheet: Supplementary Table S3
Supplementary Table S3. Genes identified using the least absolute shrinkage and selection operator regression algorithm.
Gene	Coefficient
GZMM	2.32394
GBP2	-0.293349
HSPG2	0.658217
SERPING1	1.27363

## Sheet: Supplementary Table S4
Supplementary Table S4. Genes identified using the support vector machine-recursive feature elimination algorithm.
FeatureName	FeatureID	AvgRank
SERPING1	9	1
GZMM	3	2.2
SAMHD1	10	4.6
GBP2	5	4.9
HSPG2	6	5.2
CD8A	4	6.5

## Sheet: Supplementary Table S5
Supplementary Table S5. Genes identified using the random forest algorithm.
Gene	Importance
IL7R	1.06723
GZMM	2.15309
CD8A	4.42798
HSPG2	3.86155
IFITM1	1.41429
SERPING1	6.61988
SAMHD1	1.09376
